# Supplementary material for: Theoretical study of copper complexes with lipoic and dihydrolipoic acids
Source: Royal Society of Chemistry journal article supplement (doi:10.1039/c6ra23553k), 2016-01-01
Supplement: c6ra23553k1.pdf [file c6ra23553k1.pdf]

## Theoretical Study of the Copper Complexes with Lipoic and Dihydrolipoic Acids

Romina Castañeda-Arriaga,<sup>1,2</sup> J. Raul Alvarez-Idaboy,<sup>1\*</sup> Nelaine Mora-Diez<sup>2\*</sup>

<sup>1</sup>Facultad de Química, Departamento de Física y Química Teórica, Universidad Nacional Autónoma de México, México DF 04510, Mexico.

<sup>2</sup>Department of Chemistry, Thompson Rivers University, Kamloops, BC, V2C 0C8, Canada.

### Electronic Supplementary Information

(23 pages)

#### Contents:

**Figure S1.** Distribution diagram for the acid/base species of LA as a function of pH.

**Figure S2.** Distribution diagram for the acid/base species of DHLA as a function of pH.

**Table S1.** Absolute enthalpies and Gibbs free energies of the different species considered in this study at the M06-2X-SMD/6-31++G(d,p) level of theory in water at 298.15 K.

M06-2X-SMD/6-31++G(d,p) Cartesian coordinates of the optimized geometries in water of the species calculated in this study.

---

\* Corresponding authors e-mail: nmora@tru.ca, jidaboy@unam.mx

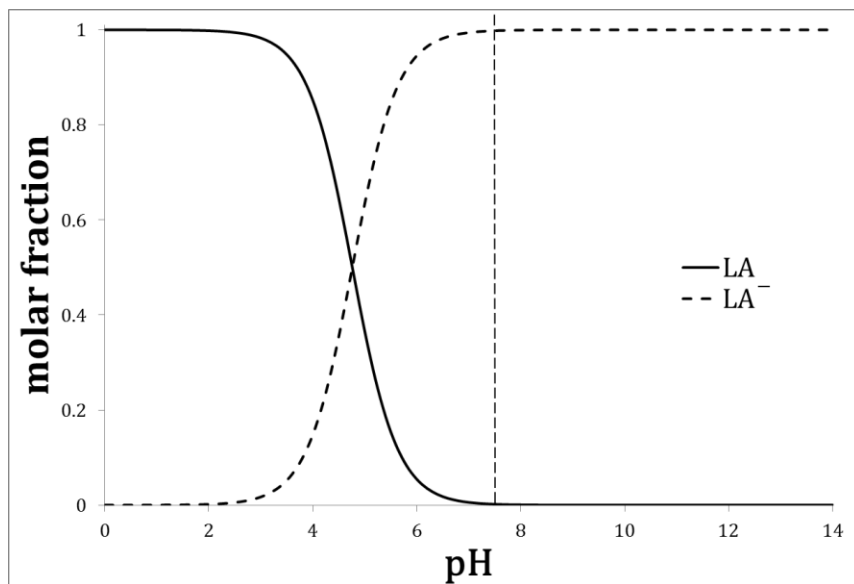

**Figure S1.** Distribution diagram for the acid/base species of LA as a function of pH.

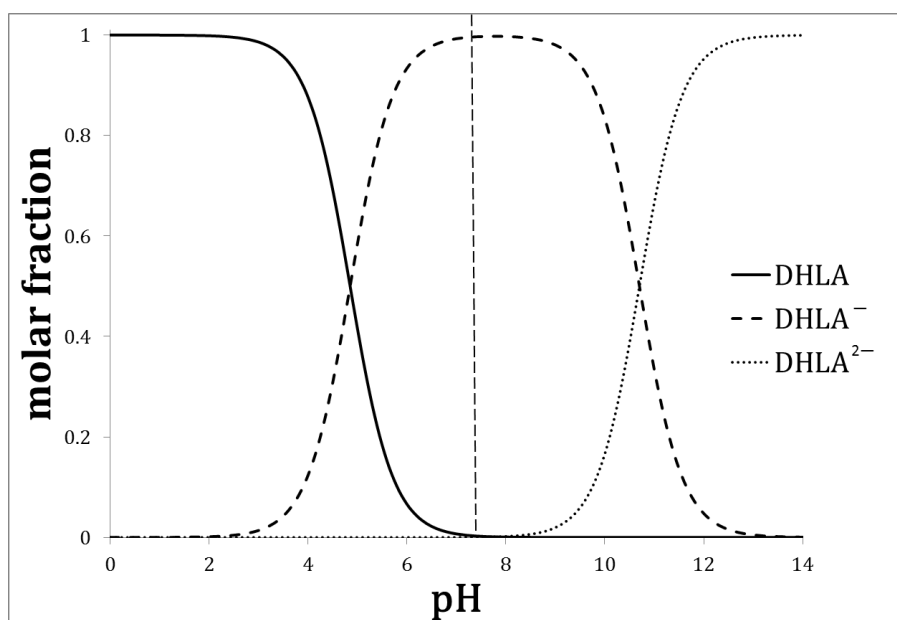

**Figure S2.** Distribution diagram for the acid/base species of DHLA as a function of pH.

**Table S1.** Absolute enthalpies and Gibbs free energies of the different species considered in this study at the M06-2X-SMD/6-31++G(d,p) level of theory in water at 298.15 K.

|      | Species                                                               | H° (au)      | G° (au)      |
|------|-----------------------------------------------------------------------|--------------|--------------|
| [1]  | Cu <sup>2+</sup> – LA <sup>-</sup> (CO)                               | -3128.447001 | -3128.523818 |
| [2]  | Cu <sup>2+</sup> – LA <sup>-</sup> (COO)                              | -3052.047687 | -3052.121095 |
| [3]  | Cu <sup>2+</sup> – LA <sup>-</sup> (CO, S2 <i>trans</i> )             | -3052.040074 | -3052.106314 |
| [4]  | Cu <sup>2+</sup> – LA <sup>-</sup> (CO, S1 <i>cis</i> )               | -3052.038496 | -3052.105204 |
| [5]  | Cu <sup>2+</sup> – LA <sup>-</sup> (CO, S2 <i>cis</i> )               | -3052.036201 | -3052.101857 |
| [6]  | Cu <sup>2+</sup> – LA <sup>-</sup> (S1)                               | -3128.409631 | -3128.486437 |
| [7]  | Cu <sup>2+</sup> – LA <sup>-</sup> (S2)                               | -3128.405430 | -3128.481366 |
| [8]  | Cu <sup>2+</sup> – DHLA <sup>-</sup> (CO)                             | -3129.621696 | -3129.699254 |
| [9]  | Cu <sup>2+</sup> – DHLA <sup>-</sup> (COO)                            | -3053.223720 | -3053.296113 |
| [10] | Cu <sup>2+</sup> – DHLA <sup>-</sup> (CO, S2 <i>cis</i> )             | -3053.221427 | -3053.290923 |
| [11] | Cu <sup>2+</sup> – DHLA <sup>-</sup> (CO, S2 <i>trans</i> )           | -3053.215262 | -3053.283538 |
| [12] | Cu <sup>2+</sup> – DHLA <sup>-</sup> (CO, S1 <i>cis</i> )             | -3053.207391 | -3053.277178 |
| [13] | Cu <sup>2+</sup> – DHLA <sup>-</sup> (CO, S1 <i>trans</i> )           | -3053.207375 | -3053.276666 |
| [14] | Cu <sup>2+</sup> – DHLA <sup>-</sup> (S1)                             | -3129.584080 | -3129.665061 |
| [15] | Cu <sup>2+</sup> – DHLA <sup>-</sup> (CO, S1, S2)                     | -2976.806770 | -2976.868901 |
| [16] | Cu <sup>2+</sup> – DHLA <sup>-</sup> (S2)                             | -3129.581771 | -3129.660084 |
| [17] | Cu <sup>2+</sup> – DHLA <sup>-</sup> (S1, S2 <i>cis</i> )             | -3053.182286 | -3053.253664 |
| [18] | Cu <sup>2+</sup> – DHLA <sup>2-</sup> (CO, S1 <i>trans</i> )          | -3052.777637 | -3052.847064 |
| [19] | Cu <sup>2+</sup> – DHLA <sup>2-</sup> (CO, S1 <i>cis</i> )            | -3052.774480 | -3052.844820 |
| [20] | Cu <sup>2+</sup> – DHLA <sup>2-</sup> (S1)                            | -3129.157314 | -3129.236924 |
| [21] | Cu <sup>2+</sup> – DHLA <sup>2-</sup> (CO)                            | -3129.156156 | -3129.232134 |
| [22] | Cu <sup>2+</sup> – DHLA <sup>2-</sup> (COO)                           | -3052.757973 | -3052.829271 |
| [23] | Cu <sup>2+</sup> – DHLA <sup>2-</sup> (CO, S2 <i>cis</i> )            | -3052.787975 | -3052.857491 |
| [24] | Cu <sup>2+</sup> – DHLA <sup>2-</sup> (CO, S2 <i>trans</i> )          | -3052.783826 | -3052.851908 |
| [25] | Cu <sup>2+</sup> – DHLA <sup>2-</sup> (CO)                            | -3129.174664 | -3129.249725 |
| [26] | Cu <sup>2+</sup> – DHLA <sup>2-</sup> (COO, S2)                       | -2976.384686 | -2976.448570 |
| [27] | Cu <sup>2+</sup> – DHLA <sup>2-</sup> (S2)                            | -3129.157881 | -3129.235813 |
| [28] | Cu <sup>2+</sup> – DHLA <sup>2-</sup> (COO)                           | -3052.757780 | -3052.829498 |
| [29] | Cu <sup>+</sup> – DHLA <sup>2-</sup> (COO)                            | -3052.927833 | -3053.001687 |
| [30] | [Cu(H <sub>2</sub> O) <sub>2</sub> ] <sup>+</sup> · 2H <sub>2</sub> O | -1945.717783 | -1945.773093 |
| [31] | [Cu(H <sub>2</sub> O) <sub>4</sub> ] <sup>2+</sup>                    | -1945.577002 | -1945.624279 |
| [32] | (H <sub>2</sub> O) <sub>2</sub>                                       | -152.771849  | -152.804083  |
| [33] | (H <sub>2</sub> O) <sub>3</sub>                                       | -229.158963  | -229.200715  |
| [34] | LA <sup>-</sup>                                                       | -1259.227997 | -1259.284568 |
| [35] | DHLA <sup>-</sup>                                                     | -1260.404853 | -1260.464494 |
| [36] | S1-deprotonated DHLA <sup>2-</sup>                                    | -1259.937581 | -1259.996159 |
| [37] | S2-deprotonated DHLA <sup>2-</sup>                                    | -1259.936736 | -1259.995440 |

M06-2X-SMD/6-31++G(d,p) Cartesian coordinates of the optimized geometries in water of the species calculated in this study.

[1] Cu<sup>2+</sup> – LA<sup>-</sup> (CO)

Charge = 1 Multiplicity = 2

|    |             |             |             |
|----|-------------|-------------|-------------|
| C  | -6.94300400 | -0.52599400 | 0.31624800  |
| H  | -7.23375000 | 0.00992700  | 1.22388100  |
| H  | -7.76049600 | -1.18082600 | 0.00493100  |
| C  | -5.63529200 | -1.28199100 | 0.49670200  |
| H  | -5.44577700 | -1.89068200 | -0.39407200 |
| H  | -5.69997100 | -1.95192800 | 1.36048800  |
| C  | -4.46148300 | -0.31851300 | 0.70829900  |
| H  | -4.41628800 | -0.01852000 | 1.75987800  |
| S  | -6.65363500 | 0.66611500  | -1.03197500 |
| S  | -4.81454100 | 1.26857500  | -0.20795200 |
| C  | -3.12554500 | -0.92078700 | 0.28822700  |
| H  | -3.02217100 | -1.88534800 | 0.80487400  |
| H  | -3.15414500 | -1.13294400 | -0.78857600 |
| C  | -1.92432300 | -0.04110200 | 0.62016100  |
| H  | -2.02468000 | 0.92594100  | 0.10754700  |
| H  | -1.91836200 | 0.17200000  | 1.69780600  |
| C  | -0.59676000 | -0.68128700 | 0.22063300  |
| H  | -0.60617300 | -0.90520000 | -0.85318900 |
| H  | -0.47808300 | -1.63747300 | 0.74350800  |
| C  | 0.57956300  | 0.23118500  | 0.53983900  |
| H  | 0.46969300  | 1.19827200  | 0.03626900  |
| H  | 0.61561500  | 0.45162200  | 1.61468800  |
| C  | 1.94100300  | -0.31568200 | 0.16924500  |
| O  | 2.91627500  | 0.50812800  | 0.28059900  |
| O  | 2.06657600  | -1.50735600 | -0.20689100 |
| Cu | 4.82809600  | 0.14924900  | -0.07953300 |
| O  | 4.56803900  | -1.75325300 | -0.69887700 |
| H  | 3.57582700  | -1.83169200 | -0.51709200 |
| H  | 5.02242900  | -2.37013400 | -0.10708500 |
| O  | 6.83249400  | -0.00710700 | -0.36550700 |
| H  | 7.21236200  | 0.81096500  | -0.72019900 |
| H  | 7.04533800  | -0.70174100 | -1.00687600 |
| O  | 5.10660400  | 2.14113300  | 0.38835700  |
| H  | 5.95225400  | 2.29998900  | 0.83407200  |
| H  | 4.41754500  | 2.42719900  | 1.00685800  |

[2] Cu<sup>2+</sup> – LA<sup>-</sup> (COO)

Charge = 1 Multiplicity = 2

|   |            |             |             |
|---|------------|-------------|-------------|
| C | 6.38013200 | 0.91951400  | 0.26465800  |
| H | 6.77184200 | 0.43709900  | 1.16423300  |
| H | 7.08235700 | 1.68650100  | -0.07134400 |
| C | 4.97930900 | 1.47297200  | 0.47986300  |
| H | 4.68102800 | 2.04577300  | -0.40491300 |
| H | 4.96514300 | 2.14687800  | 1.34286700  |
| C | 3.96474200 | 0.34640700  | 0.71707000  |
| H | 3.97438700 | 0.05830800  | 1.77279000  |
| S | 6.23285900 | -0.31050900 | -1.07255200 |
| S | 4.54369800 | -1.18444100 | -0.17895000 |
| C | 2.55041700 | 0.73909300  | 0.30599600  |
| H | 2.31373200 | 1.68717000  | 0.80936200  |
| H | 2.53541000 | 0.93544300  | -0.77413900 |
| C | 1.49192700 | -0.29834600 | 0.66782000  |
| H | 1.71365000 | -1.24531400 | 0.15647400  |

|    |             |             |             |
|----|-------------|-------------|-------------|
| H  | 1.53673600  | -0.50217200 | 1.74624000  |
| C  | 0.08313900  | 0.15608500  | 0.29537700  |
| H  | 0.04087600  | 0.37880000  | -0.77785600 |
| H  | -0.15294100 | 1.08663900  | 0.82385400  |
| C  | -0.95924200 | -0.90370500 | 0.63479700  |
| H  | -0.75502200 | -1.84638000 | 0.11724000  |
| H  | -0.93992300 | -1.12973100 | 1.70961100  |
| C  | -2.37382400 | -0.50762200 | 0.32259300  |
| O  | -3.28909900 | -1.39216100 | 0.24059400  |
| O  | -2.70724700 | 0.71002400  | 0.16188400  |
| Cu | -4.65431800 | 0.11426300  | -0.10401900 |
| O  | -5.55420000 | 1.86541900  | -0.56408900 |
| H  | -5.04613400 | 2.61148100  | -0.21090600 |
| H  | -6.43580700 | 1.93041200  | -0.16664900 |
| O  | -6.33318400 | -1.00915500 | -0.34148300 |
| H  | -7.12396900 | -0.53979900 | -0.03613100 |
| H  | -6.27916800 | -1.81781400 | 0.18958400  |

### [3] Cu<sup>2+</sup> – LA<sup>-</sup> (CO, S2 *trans*)

Charge = 1 Multiplicity = 2

|    |             |             |             |
|----|-------------|-------------|-------------|
| C  | -3.27328600 | 0.46660900  | 0.30521300  |
| H  | -4.02762900 | 0.92157800  | -0.34071100 |
| H  | -3.76548600 | -0.18537200 | 1.03094000  |
| C  | -2.38603200 | 1.50985700  | 0.98030500  |
| H  | -1.93024600 | 1.05914400  | 1.86680400  |
| H  | -3.00813500 | 2.34511100  | 1.31382900  |
| C  | -1.24307700 | 2.03357800  | 0.07236200  |
| H  | -1.42162900 | 3.07275300  | -0.22175100 |
| S  | -2.21323800 | -0.57193100 | -0.75616900 |
| S  | -1.27797800 | 1.11812600  | -1.54161900 |
| C  | 0.10175700  | 1.89995400  | 0.77784300  |
| H  | 0.00737400  | 2.39825300  | 1.75285100  |
| H  | 0.26601900  | 0.83780200  | 0.99316300  |
| C  | 1.30503900  | 2.48747600  | 0.03852000  |
| H  | 1.28457800  | 2.17495500  | -1.01468700 |
| H  | 1.21732200  | 3.57959800  | 0.03640800  |
| C  | 2.64356100  | 2.05677500  | 0.67249500  |
| H  | 2.47194600  | 1.73918000  | 1.70760400  |
| H  | 3.33581300  | 2.90223600  | 0.71688500  |
| C  | 3.34841200  | 0.92989000  | -0.09878300 |
| H  | 3.71672300  | 1.30052800  | -1.05826400 |
| H  | 4.20527400  | 0.56135800  | 0.47621600  |
| C  | 2.43434700  | -0.24571300 | -0.37303000 |
| O  | 1.86138000  | -0.78953100 | 0.63211600  |
| O  | 2.27104600  | -0.63167600 | -1.56288300 |
| Cu | 0.08467000  | -1.72135900 | 0.44742200  |
| O  | -0.49557700 | -1.33481700 | 2.31367800  |
| H  | 0.23430000  | -0.94877300 | 2.82393000  |
| H  | -0.75582900 | -2.14260500 | 2.78310300  |
| O  | 0.37893800  | -2.28787000 | -1.41566700 |
| H  | 0.66550200  | -3.21286700 | -1.44397300 |
| H  | 1.19752100  | -1.70197400 | -1.62049000 |

### [4] Cu<sup>2+</sup> – LA<sup>-</sup> (CO, S1 *cis*)

Charge = 1 Multiplicity = 2

|   |             |             |             |
|---|-------------|-------------|-------------|
| C | -2.19847300 | -2.13451600 | -1.15494500 |
| H | -2.65435500 | -3.06759500 | -0.82051100 |
| H | -2.38329800 | -1.99729200 | -2.22136200 |
| C | -0.71159400 | -2.09347600 | -0.82844400 |
| H | -0.22627400 | -1.28183700 | -1.37290100 |
| H | -0.26082200 | -3.04533300 | -1.12978800 |
| C | -0.54969800 | -1.90552700 | 0.67901200  |
| H | -1.10823600 | -2.70779900 | 1.17380000  |

|    |             |             |             |
|----|-------------|-------------|-------------|
| S  | -3.05730900 | -0.75441600 | -0.27164500 |
| S  | -1.47687600 | -0.36212100 | 1.07023800  |
| C  | 0.85089300  | -1.82180800 | 1.31919800  |
| H  | 1.17825900  | -0.78261700 | 1.41239400  |
| H  | 0.74752200  | -2.19231500 | 2.34333000  |
| C  | 1.93762800  | -2.64488900 | 0.61290200  |
| H  | 2.74279000  | -2.80784500 | 1.33959200  |
| H  | 1.53784100  | -3.63725200 | 0.37072600  |
| C  | 2.56616000  | -2.03396700 | -0.64804100 |
| H  | 1.82762700  | -1.91733100 | -1.44527800 |
| H  | 3.30871600  | -2.74864700 | -1.01917800 |
| C  | 3.28183600  | -0.70137100 | -0.42394700 |
| H  | 3.94669900  | -0.74879800 | 0.44545100  |
| H  | 3.92227500  | -0.47569400 | -1.28610000 |
| C  | 2.40008900  | 0.52079000  | -0.25141700 |
| O  | 1.19208700  | 0.43854700  | -0.67492900 |
| O  | 2.88686200  | 1.55360000  | 0.26827400  |
| Cu | -0.26904100 | 1.59574300  | -0.13849300 |
| O  | 0.92298400  | 3.27643100  | -0.13311000 |
| H  | 1.77835000  | 2.82430200  | 0.10373100  |
| H  | 0.68917700  | 3.86240300  | 0.60097600  |
| O  | -1.98463400 | 2.60992600  | 0.18373600  |
| H  | -2.52052800 | 2.63753200  | -0.62466800 |
| H  | -1.77602400 | 3.53471900  | 0.39091500  |

### [5] Cu<sup>2+</sup> – LA<sup>-</sup> (CO, S2 *cis*)

Charge = 1 Multiplicity = 2

|    |             |             |             |
|----|-------------|-------------|-------------|
| C  | -0.36805000 | -2.38407700 | 1.46413400  |
| H  | -0.61775400 | -3.44711500 | 1.42869100  |
| H  | 0.07518200  | -2.14170600 | 2.43298900  |
| C  | -1.53556700 | -1.47375400 | 1.11871700  |
| H  | -1.22959600 | -0.45529100 | 1.34248900  |
| H  | -2.39846000 | -1.72878600 | 1.74201800  |
| C  | -1.93736500 | -1.56070300 | -0.36781700 |
| H  | -2.72630400 | -2.30908800 | -0.48685300 |
| S  | 0.89620800  | -2.08772600 | 0.18251100  |
| S  | -0.51476900 | -2.26927700 | -1.34236000 |
| C  | -2.38400000 | -0.24121400 | -1.00955100 |
| H  | -1.50157600 | 0.37153700  | -1.21735400 |
| H  | -2.81582800 | -0.48616800 | -1.98550800 |
| C  | -3.41647700 | 0.56241900  | -0.20104700 |
| H  | -4.01565300 | 1.14016900  | -0.91486000 |
| H  | -4.11287800 | -0.12810700 | 0.29162600  |
| C  | -2.87359100 | 1.55773200  | 0.83849400  |
| H  | -2.39117100 | 1.05302300  | 1.67872800  |
| H  | -3.73754000 | 2.08242800  | 1.26048400  |
| C  | -1.93382300 | 2.62137200  | 0.26924600  |
| H  | -2.34069700 | 3.04802400  | -0.65385500 |
| H  | -1.85353900 | 3.45459700  | 0.97944400  |
| C  | -0.49520900 | 2.22998900  | -0.01887100 |
| O  | 0.00445600  | 1.22705700  | 0.60692500  |
| O  | 0.15447300  | 2.93824900  | -0.82901900 |
| Cu | 1.74094900  | 0.38228200  | 0.20032900  |
| O  | 2.56256300  | 2.19363500  | -0.27658000 |
| H  | 1.72778800  | 2.62996600  | -0.62573400 |
| H  | 3.18983200  | 2.12717800  | -1.01091200 |
| O  | 3.50323900  | -0.54855700 | -0.06481200 |
| H  | 3.82178800  | -1.02671900 | 0.71665400  |
| H  | 4.20249500  | 0.08826900  | -0.28195800 |

### [6] Cu<sup>2+</sup> – LA<sup>-</sup> (S1)

Charge = 1 Multiplicity = 2

|   |            |             |             |
|---|------------|-------------|-------------|
| C | 3.58530500 | -2.21012200 | -0.52251000 |
|---|------------|-------------|-------------|

|    |             |             |             |
|----|-------------|-------------|-------------|
| H  | 3.76069500  | -1.96921100 | -1.57156400 |
| H  | 4.36663300  | -2.88023400 | -0.16251100 |
| C  | 2.19233600  | -2.79324900 | -0.31435000 |
| H  | 2.13122700  | -3.32697400 | 0.63951700  |
| H  | 1.97951300  | -3.50211300 | -1.12121000 |
| C  | 1.15944600  | -1.67645500 | -0.34845000 |
| H  | 1.23227500  | -1.12462700 | -1.29183700 |
| S  | 3.74401700  | -0.62485700 | 0.42593200  |
| S  | 1.71422400  | -0.51118600 | 0.97899600  |
| C  | -0.28063100 | -2.09649700 | -0.09777800 |
| H  | -0.55609900 | -2.76143900 | -0.92569200 |
| H  | -0.34466300 | -2.68358800 | 0.82667700  |
| C  | -1.24738300 | -0.91261000 | -0.04720500 |
| H  | -1.09238700 | -0.34809800 | 0.88377700  |
| H  | -1.02443600 | -0.22438100 | -0.87747700 |
| C  | -2.71022700 | -1.34320300 | -0.11159300 |
| H  | -2.91594100 | -2.04585500 | 0.70502400  |
| H  | -2.88515600 | -1.88721800 | -1.04750700 |
| C  | -3.65994900 | -0.15626900 | -0.02014100 |
| H  | -3.49424400 | 0.39256400  | 0.91606700  |
| H  | -3.45596800 | 0.55784000  | -0.82770900 |
| C  | -5.14989900 | -0.49462200 | -0.07972000 |
| O  | -5.95591700 | 0.48448600  | -0.06308100 |
| O  | -5.50309000 | -1.70562600 | -0.13626500 |
| Cu | 0.83153600  | 1.71641200  | -0.01715000 |
| O  | -0.28405100 | 2.07441700  | 1.60848000  |
| H  | -0.33797900 | 1.41722400  | 2.31911800  |
| H  | -0.01317700 | 2.90522900  | 2.03016400  |
| O  | 0.11130900  | 3.46808600  | -0.77066500 |
| H  | -0.07704200 | 4.12994400  | -0.08788900 |
| H  | 0.73339000  | 3.88598800  | -1.38512500 |
| O  | 1.93242700  | 1.28719000  | -1.64184200 |
| H  | 2.86171300  | 1.07654300  | -1.44672000 |
| H  | 1.94585800  | 2.01890500  | -2.27913900 |

### [7] Cu<sup>2+</sup> - LA<sup>-</sup> (S2)

Charge = 1 Multiplicity = 2

|    |             |             |             |
|----|-------------|-------------|-------------|
| C  | -1.48054600 | 1.90254100  | 0.86600800  |
| H  | -2.29372400 | 2.47311700  | 1.31948500  |
| H  | -1.18360500 | 1.08287200  | 1.52483100  |
| C  | -0.30715000 | 2.78297500  | 0.46325600  |
| H  | 0.18879300  | 3.16586000  | 1.36073900  |
| H  | -0.68051900 | 3.63627800  | -0.10908100 |
| C  | 0.71800600  | 2.00039000  | -0.37078700 |
| H  | 1.19170700  | 2.67205500  | -1.09161700 |
| S  | -2.11178500 | 1.21947700  | -0.70669300 |
| S  | -0.18956600 | 0.72417600  | -1.39544700 |
| C  | 1.79751300  | 1.31393200  | 0.46051400  |
| H  | 2.28301600  | 2.10082100  | 1.05273300  |
| H  | 1.33530500  | 0.61203100  | 1.16678300  |
| C  | 2.85550300  | 0.60868200  | -0.38425100 |
| H  | 2.40365100  | -0.23437000 | -0.92571000 |
| H  | 3.22660200  | 1.30949900  | -1.14493900 |
| C  | 4.03121000  | 0.09965600  | 0.44729100  |
| H  | 3.66658300  | -0.59923500 | 1.21035800  |
| H  | 4.48483700  | 0.94195000  | 0.98339400  |
| C  | 5.08336000  | -0.58327300 | -0.41611200 |
| H  | 4.64524000  | -1.43347800 | -0.95309200 |
| H  | 5.44259300  | 0.10752300  | -1.18994000 |
| C  | 6.31861200  | -1.10071100 | 0.32051600  |
| O  | 7.16941800  | -1.73248000 | -0.37638800 |
| O  | 6.43788400  | -0.87522800 | 1.55763200  |
| Cu | -3.38770500 | -0.91406800 | 0.12491600  |
| O  | -2.24165300 | -2.15980000 | -0.92597000 |
| H  | -2.37705500 | -2.12342200 | -1.88570400 |

|   |             |             |             |
|---|-------------|-------------|-------------|
| H | -1.28760300 | -2.06750900 | -0.77722000 |
| O | -4.75241300 | -2.37424000 | 0.43336600  |
| H | -4.33909300 | -3.25044000 | 0.46253800  |
| H | -5.22638100 | -2.26854300 | 1.27205000  |
| O | -4.29473400 | 0.44782700  | 1.28555700  |
| H | -3.85533500 | 0.51581500  | 2.14888000  |
| H | -5.20699600 | 0.17493800  | 1.47501300  |

### [8] Cu<sup>2+</sup> – DHLA<sup>-</sup> (CO)

Charge = 1 Multiplicity = 2

|    |             |             |             |
|----|-------------|-------------|-------------|
| C  | -0.68777900 | -3.23227500 | -0.17773400 |
| H  | -1.03066900 | -4.16244000 | 0.28135000  |
| H  | -0.68720000 | -3.34922100 | -1.26507400 |
| C  | 0.73805100  | -2.91464000 | 0.30470000  |
| H  | 1.37179800  | -3.77448500 | 0.05972700  |
| H  | 0.74128300  | -2.81910200 | 1.39777800  |
| C  | 1.33503300  | -1.65578000 | -0.32327800 |
| H  | 0.74888800  | -0.77885600 | -0.01837700 |
| H  | 1.25808600  | -1.72140000 | -1.41778200 |
| C  | 2.79860400  | -1.46644000 | 0.07622900  |
| H  | 3.35082100  | -2.38877900 | -0.14050100 |
| C  | 3.47736500  | -0.31110600 | -0.66670900 |
| C  | 2.74440200  | 1.03102400  | -0.55930400 |
| H  | 1.80554400  | 0.94376800  | -1.12144500 |
| H  | 3.33391300  | 1.80713600  | -1.05983500 |
| H  | 3.54305700  | -0.57394000 | -1.72683100 |
| C  | -1.64953500 | -2.12692400 | 0.19998100  |
| O  | -2.22235100 | -2.15627300 | 1.31721200  |
| O  | -1.79977300 | -1.18228900 | -0.65514900 |
| C  | 2.43879200  | 1.46434200  | 0.86848900  |
| H  | 1.84413100  | 0.71716000  | 1.39841000  |
| H  | 3.36001500  | 1.61939700  | 1.43674400  |
| H  | 2.86369800  | -1.30734300 | 1.16083100  |
| S  | 1.55355500  | 3.06234700  | 0.94617600  |
| H  | 0.48150000  | 2.67054000  | 0.23465900  |
| S  | 5.20815900  | -0.20688300 | -0.03907800 |
| H  | 5.61946300  | 0.76205700  | -0.87490400 |
| Cu | -2.76287400 | 0.50761300  | -0.33431700 |
| O  | -1.34495800 | 1.38962700  | -1.51122300 |
| H  | -1.22552700 | 2.33241600  | -1.32245700 |
| H  | -0.48315600 | 0.96870500  | -1.36642800 |
| O  | -3.72375200 | 2.28089600  | -0.14503200 |
| H  | -3.66440900 | 2.81075900  | -0.95450200 |
| H  | -4.66963300 | 2.15908800  | 0.02779100  |
| O  | -4.13957300 | -0.35954800 | 0.89644000  |
| H  | -4.38723100 | 0.23860700  | 1.61669800  |
| H  | -3.56480600 | -1.07078600 | 1.28353800  |

### [9] Cu<sup>2+</sup> – DHLA<sup>-</sup> (COO)

Charge = 1 Multiplicity = 2

|   |             |             |             |
|---|-------------|-------------|-------------|
| C | 0.63304900  | -3.19684900 | 0.19295700  |
| H | 1.10054000  | -3.97995800 | -0.41035400 |
| H | 0.59272200  | -3.52180700 | 1.23500900  |
| C | -0.77738600 | -2.88310900 | -0.33748700 |
| H | -1.39955000 | -3.77779500 | -0.23297500 |
| H | -0.71291300 | -2.65364800 | -1.40771700 |
| C | -1.40946300 | -1.70468800 | 0.39910500  |
| H | -0.71006800 | -0.85873400 | 0.37229900  |
| H | -1.54802700 | -1.95899300 | 1.45876300  |
| C | -2.73646300 | -1.26246000 | -0.21298300 |
| H | -3.44403900 | -2.09983100 | -0.21224700 |
| C | -3.36567200 | -0.08159800 | 0.53917200  |
| C | -2.39151100 | 1.06772500  | 0.82730400  |



|    |             |             |             |
|----|-------------|-------------|-------------|
| H  | -1.64861500 | 0.69607500  | 1.54342000  |
| H  | -2.92413300 | 1.88173100  | 1.33130600  |
| H  | -3.74798600 | -0.44406400 | 1.49804500  |
| C  | 1.47236100  | -1.95474600 | 0.10195400  |
| O  | 1.78506600  | -1.46844100 | -1.03347500 |
| O  | 1.83045900  | -1.31517700 | 1.14539500  |
| C  | -1.67914900 | 1.61356400  | -0.40670100 |
| H  | -1.28082400 | 0.81530000  | -1.03729600 |
| H  | -2.35910900 | 2.20694400  | -1.02270400 |
| H  | -2.56955400 | -0.99188200 | -1.26395400 |
| S  | -0.29822700 | 2.73947100  | 0.01033500  |
| H  | 0.52166900  | 1.79957100  | 0.52277600  |
| S  | -4.82490100 | 0.46636700  | -0.44453400 |
| H  | -5.26040900 | 1.39675100  | 0.42203400  |
| Cu | 2.59632500  | 0.15990800  | -0.03902500 |
| O  | 3.02574800  | 1.55803300  | 1.36598100  |
| H  | 3.16488600  | 1.13587700  | 2.22749100  |
| H  | 3.84311200  | 2.03972000  | 1.16724800  |
| O  | 3.23775300  | 1.25590300  | -1.61131000 |
| H  | 3.94282800  | 1.87492800  | -1.36873800 |
| H  | 3.60929400  | 0.67949500  | -2.29616100 |

### [10] Cu<sup>2+</sup> – DHLA<sup>-</sup> (CO, S2 *cis*)

Charge = 1 Multiplicity = 2

|    |             |             |             |
|----|-------------|-------------|-------------|
| C  | -0.32042500 | 3.19297900  | -0.58863600 |
| H  | -0.75145500 | 3.63636900  | -1.49501100 |
| H  | -0.31810200 | 3.97605800  | 0.17590600  |
| C  | 1.08492200  | 2.66828000  | -0.85770700 |
| H  | 1.69685500  | 3.47170700  | -1.28183100 |
| H  | 1.02809500  | 1.88321100  | -1.61887700 |
| C  | 1.75119300  | 2.11706900  | 0.40837900  |
| H  | 0.99851200  | 1.57639100  | 0.99332300  |
| H  | 2.07091000  | 2.95322800  | 1.03958500  |
| C  | 2.94769700  | 1.18921200  | 0.11694200  |
| H  | 3.88495600  | 1.67680100  | 0.40300000  |
| C  | 2.86032400  | -0.15415200 | 0.85493500  |
| C  | 1.59127600  | -0.96726300 | 0.55777700  |
| H  | 0.73369200  | -0.45434200 | 1.00954700  |
| H  | 1.66869700  | -1.94215000 | 1.05381400  |
| H  | 2.88854000  | 0.03389200  | 1.93248900  |
| C  | -1.29683800 | 2.12209300  | -0.13887500 |
| O  | -2.29593900 | 2.46885600  | 0.54124900  |
| O  | -1.06217200 | 0.91563100  | -0.50170000 |
| C  | 1.32108500  | -1.17318600 | -0.92577100 |
| H  | 1.20707100  | -0.22585500 | -1.45648300 |
| H  | 2.11408800  | -1.74579000 | -1.41098500 |
| H  | 3.01676700  | 1.00076000  | -0.96230800 |
| S  | -0.25754000 | -2.03581800 | -1.24617700 |
| H  | -0.09878800 | -3.06132500 | -0.38781800 |
| S  | 4.39181900  | -1.09127600 | 0.43465600  |
| H  | 4.13463900  | -2.16891600 | 1.19597200  |
| Cu | -2.01780300 | -0.69227600 | 0.06858700  |
| O  | -2.81583100 | -2.51002200 | 0.47727500  |
| H  | -2.40362800 | -2.91547400 | 1.25631800  |
| H  | -3.75385400 | -2.40536100 | 0.70228400  |
| O  | -3.55357900 | 0.30022000  | 0.98079100  |
| H  | -4.36257700 | 0.21128700  | 0.45686300  |
| H  | -3.20184800 | 1.24135900  | 0.84633500  |

### [11] Cu<sup>2+</sup> – DHLA<sup>-</sup> (CO, S2 *trans*)

Charge = 1 Multiplicity = 2

|   |            |            |            |
|---|------------|------------|------------|
| C | 2.09867600 | 2.76807900 | 0.09195100 |
| H | 2.74842300 | 3.20704700 | 0.85659600 |

|    |             |             |             |
|----|-------------|-------------|-------------|
| H  | 2.16618500  | 3.38027300  | -0.81071500 |
| C  | 0.65217600  | 2.69855000  | 0.60785900  |
| H  | 0.27206500  | 3.71753000  | 0.73843500  |
| H  | 0.64754900  | 2.22435400  | 1.59694700  |
| C  | -0.26642000 | 1.91434300  | -0.32986000 |
| H  | 0.17288400  | 0.92309900  | -0.50384400 |
| H  | -0.31563200 | 2.40948700  | -1.30902600 |
| C  | -1.67463700 | 1.73301400  | 0.23389800  |
| H  | -2.12875500 | 2.71712700  | 0.40195700  |
| C  | -2.59152200 | 0.92686400  | -0.69592200 |
| C  | -2.06044000 | -0.46143900 | -1.07369600 |
| H  | -1.09775000 | -0.31717300 | -1.57930500 |
| H  | -2.72825600 | -0.91799300 | -1.81105600 |
| H  | -2.72630800 | 1.49328600  | -1.62194000 |
| C  | 2.60107600  | 1.37471100  | -0.22928200 |
| O  | 3.04977100  | 1.10796800  | -1.36788600 |
| O  | 2.47572100  | 0.49382400  | 0.70270100  |
| C  | -1.90513400 | -1.40415300 | 0.12161300  |
| H  | -1.60404900 | -0.87440600 | 1.02720700  |
| H  | -2.82635300 | -1.94976600 | 0.32655000  |
| H  | -1.60882700 | 1.24662100  | 1.21686500  |
| S  | -0.60137200 | -2.64928700 | -0.26214400 |
| H  | -0.69322100 | -3.35871600 | 0.87990000  |
| S  | -4.23938600 | 0.82472800  | 0.12325200  |
| H  | -4.83298600 | 0.06952300  | -0.81722200 |
| Cu | 1.36657000  | -1.13119700 | 0.33321200  |
| O  | 0.70151000  | -0.90491100 | 2.22242600  |
| H  | 0.30942700  | -0.02267000 | 2.32880500  |
| H  | 0.08107400  | -1.53124600 | 2.62426500  |
| O  | 1.99115900  | -1.32968200 | -1.55649300 |
| H  | 2.54012500  | -2.11867000 | -1.67942800 |
| H  | 2.57806600  | -0.53745400 | -1.67119200 |

## [12] Cu<sup>2+</sup> – DHLA- (CO, S1 *cis*)

Charge = 1 Multiplicity = 2

|    |             |             |             |
|----|-------------|-------------|-------------|
| C  | 2.51509300  | 1.21004100  | -0.91926800 |
| H  | 3.23300400  | 1.61112200  | -1.63746400 |
| H  | 1.89374600  | 0.46418700  | -1.43034800 |
| C  | 1.63003600  | 2.34448500  | -0.35746400 |
| H  | 2.21625500  | 3.26736900  | -0.32915300 |
| H  | 1.36170400  | 2.13568700  | 0.68722400  |
| C  | 0.36018400  | 2.55894400  | -1.18330500 |
| H  | 0.62845400  | 2.61080000  | -2.24544000 |
| H  | -0.08072600 | 3.52790400  | -0.92072900 |
| C  | -0.71693300 | 1.48493900  | -0.99482700 |
| H  | -0.34816500 | 0.49045500  | -1.27881400 |
| C  | -1.30966700 | 1.45791600  | 0.42444900  |
| C  | -2.81381700 | 1.16108200  | 0.45646700  |
| H  | -3.29149600 | 1.98326100  | -0.09061100 |
| H  | -3.18250000 | 1.20375300  | 1.48694500  |
| H  | -1.16663900 | 2.44143000  | 0.88224100  |
| C  | 3.24478600  | 0.52667000  | 0.21800800  |
| O  | 4.36084700  | 0.93296900  | 0.58714100  |
| O  | 2.63142300  | -0.43787900 | 0.82611100  |
| C  | -3.22042300 | -0.16169900 | -0.18230100 |
| H  | -2.82913700 | -0.25506300 | -1.19767000 |
| H  | -2.86039500 | -1.01890700 | 0.39299600  |
| H  | -1.54008400 | 1.71079200  | -1.68325400 |
| S  | -5.03405800 | -0.38477500 | -0.22309100 |
| H  | -5.30470700 | 0.70087300  | -0.96834500 |
| S  | -0.38720200 | 0.32335600  | 1.58562800  |
| H  | -1.41578300 | -0.47958100 | 1.91892500  |
| Cu | 1.03739100  | -1.34541600 | 0.18228500  |
| O  | 2.18426200  | -2.44944700 | -1.16654700 |

|   |             |             |             |
|---|-------------|-------------|-------------|
| H | 1.71033200  | -2.61651500 | -1.99502700 |
| H | 2.97056000  | -1.93792100 | -1.41093500 |
| O | -0.65727700 | -2.25733200 | -0.40858700 |
| H | -0.46319200 | -2.96287700 | -1.04598300 |
| H | -1.16500700 | -2.67774600 | 0.30307800  |

**[13] Cu<sup>2+</sup> – DHLA<sup>-</sup> (CO, S1 *trans*)**

Charge = 1 Multiplicity = 2

|    |             |             |             |
|----|-------------|-------------|-------------|
| C  | -2.24310000 | 1.84516900  | 0.50443400  |
| H  | -2.57713300 | 2.83065400  | 0.83555100  |
| H  | -1.78467500 | 1.33154500  | 1.35867800  |
| C  | -1.21330300 | 1.98792300  | -0.63273300 |
| H  | -1.57233300 | 2.74150600  | -1.34123600 |
| H  | -1.14693200 | 1.04726500  | -1.19653800 |
| C  | 0.17983200  | 2.37134100  | -0.12173200 |
| H  | 0.08898500  | 3.21062900  | 0.57767900  |
| H  | 0.79605400  | 2.72280200  | -0.95850400 |
| C  | 0.90394300  | 1.21159500  | 0.57494300  |
| H  | 0.21920400  | 0.74567900  | 1.29487200  |
| C  | 1.44095100  | 0.18111400  | -0.44140000 |
| C  | 2.93852300  | 0.32963600  | -0.72967000 |
| H  | 3.09373700  | 1.37972000  | -1.01080900 |
| H  | 3.20928800  | -0.28048500 | -1.59794500 |
| H  | 0.90606600  | 0.29175400  | -1.38937200 |
| C  | -3.44787800 | 1.02023200  | 0.08108600  |
| O  | -4.55715600 | 1.56448800  | -0.07754900 |
| O  | -3.27626800 | -0.24701500 | -0.11179700 |
| C  | 3.85090500  | -0.02800600 | 0.43951500  |
| H  | 3.56560300  | 0.49215200  | 1.35671700  |
| H  | 3.81760500  | -1.10027700 | 0.64788100  |
| H  | 1.73746900  | 1.60178200  | 1.16618400  |
| S  | 5.61030000  | 0.31830600  | 0.09057100  |
| H  | 5.48628500  | 1.65186100  | -0.01822900 |
| S  | 1.03068600  | -1.53487600 | 0.14320000  |
| H  | 1.24014100  | -2.17548200 | -1.02278700 |
| Cu | -1.53366300 | -1.16701000 | 0.02125000  |
| O  | -1.58906900 | -1.34709600 | 2.03154500  |
| H  | -1.12144900 | -0.63974000 | 2.50297700  |
| H  | -2.51919100 | -1.25454400 | 2.29518200  |
| O  | -1.39116700 | -1.52536000 | -1.97666500 |
| H  | -2.27987100 | -1.51012000 | -2.36642400 |
| H  | -0.88837100 | -0.85246600 | -2.46138700 |

**[14] Cu<sup>2+</sup> – DHLA<sup>-</sup> (S1)**

Charge = 1 Multiplicity = 2

|   |             |             |             |
|---|-------------|-------------|-------------|
| C | 4.70849000  | 1.46750100  | 0.21758800  |
| H | 5.22268000  | 2.13118700  | 0.92248200  |
| H | 5.10034600  | 1.67227100  | -0.78301500 |
| C | 3.20236200  | 1.73610900  | 0.25879900  |
| H | 3.01687300  | 2.77768300  | -0.02915500 |
| H | 2.83490300  | 1.61702400  | 1.28513100  |
| C | 2.42587200  | 0.80359700  | -0.66904300 |
| H | 2.56535500  | -0.23350100 | -0.33524400 |
| H | 2.83734600  | 0.86968200  | -1.68552200 |
| C | 0.93557300  | 1.13882800  | -0.70578800 |
| H | 0.81301000  | 2.18277300  | -1.02113200 |
| C | 0.17099800  | 0.23301500  | -1.67263700 |
| C | 0.20996400  | -1.26233600 | -1.34350700 |
| H | 1.23021500  | -1.60229000 | -1.55925500 |
| H | -0.44734300 | -1.80551600 | -2.03106000 |
| H | 0.57893100  | 0.36760200  | -2.67880700 |
| C | 5.05042600  | 0.02806100  | 0.60423600  |
| O | 4.60049300  | -0.40281400 | 1.70669100  |

|    |             |             |             |
|----|-------------|-------------|-------------|
| O  | 5.76314300  | -0.65244500 | -0.19006900 |
| C  | -0.13069900 | -1.62738400 | 0.09689800  |
| H  | 0.51749400  | -1.10891100 | 0.80654700  |
| H  | -1.16837200 | -1.38862800 | 0.35569100  |
| H  | 0.51243900  | 1.05877000  | 0.30238200  |
| S  | 0.00166000  | -3.42631000 | 0.39824500  |
| H  | 1.31139300  | -3.52711900 | 0.11143400  |
| S  | -1.55141200 | 0.89641100  | -1.81165700 |
| H  | -2.10439800 | -0.13251400 | -2.48035200 |
| Cu | -2.85896000 | 0.56849300  | 0.36754600  |
| O  | -3.95259100 | -0.73311800 | -0.73015100 |
| H  | -3.49935400 | -1.58532900 | -0.83700500 |
| H  | -4.79516900 | -0.93763200 | -0.29360100 |
| O  | -4.08054100 | 0.38636600  | 2.02369300  |
| H  | -4.54063800 | -0.46641300 | 2.01454800  |
| H  | -3.56526400 | 0.39867100  | 2.84479600  |
| O  | -1.66766200 | 1.87037000  | 1.35158200  |
| H  | -2.09398600 | 2.19622800  | 2.15977800  |
| H  | -1.36125200 | 2.65683000  | 0.87384800  |

### [15] Cu<sup>2+</sup> – DHLA<sup>-</sup> (CO, S1, S2)

Charge = 1 Multiplicity = 2

|    |             |             |             |
|----|-------------|-------------|-------------|
| C  | 2.32260800  | 0.77527100  | -0.97886600 |
| H  | 3.08712600  | 1.01653900  | -1.71941100 |
| H  | 1.48945800  | 0.27992800  | -1.49149100 |
| C  | 1.83501400  | 2.05492400  | -0.26027200 |
| H  | 2.65660700  | 2.77694500  | -0.23806800 |
| H  | 1.61512300  | 1.83285700  | 0.78944000  |
| C  | 0.62144500  | 2.71308500  | -0.92581000 |
| H  | 0.88284600  | 2.94265600  | -1.96555100 |
| H  | 0.42104100  | 3.67221700  | -0.43345800 |
| C  | -0.67381800 | 1.89380300  | -0.94875400 |
| H  | -0.48716200 | 0.89185700  | -1.35903300 |
| C  | -1.46557200 | 1.78689700  | 0.35818500  |
| C  | -2.88646300 | 1.25639900  | 0.13194600  |
| H  | -3.44596000 | 2.08064500  | -0.32757600 |
| H  | -3.37747900 | 1.04745100  | 1.08848800  |
| H  | -1.54566600 | 2.77921700  | 0.80944600  |
| C  | 2.87718900  | -0.19717000 | 0.04283800  |
| O  | 4.10077400  | -0.28230000 | 0.24320500  |
| O  | 2.02082000  | -0.87907900 | 0.73692800  |
| C  | -3.06340700 | 0.07756200  | -0.81625600 |
| H  | -4.12818000 | -0.12735600 | -0.93788200 |
| H  | -2.65425100 | 0.28310300  | -1.80772800 |
| H  | -1.36115400 | 2.37503500  | -1.65569700 |
| S  | -2.30770500 | -1.52817200 | -0.33612500 |
| H  | -2.80089500 | -1.60087600 | 0.91670200  |
| S  | -0.55328100 | 0.78501100  | 1.64403400  |
| H  | -1.63521300 | 0.28847500  | 2.27534800  |
| Cu | 0.15385300  | -1.15918600 | 0.25590400  |
| O  | 0.54435000  | -2.78263600 | -0.88790200 |
| H  | 0.37740900  | -2.66029400 | -1.83527100 |
| H  | 1.49086400  | -2.98391600 | -0.81192300 |

### [16] Cu<sup>2+</sup> – DHLA<sup>-</sup> (S2)

Charge = 1 Multiplicity = 2

|   |            |             |             |
|---|------------|-------------|-------------|
| C | 5.39282400 | -0.30939200 | 0.19084100  |
| H | 6.23902400 | -0.39886900 | 0.88445500  |
| H | 5.81041100 | -0.03112500 | -0.78224700 |
| C | 4.41907000 | 0.75523300  | 0.68661200  |
| H | 4.95820600 | 1.69632600  | 0.84737800  |
| H | 4.01539000 | 0.44991600  | 1.65927800  |
| C | 3.26321500 | 0.98993200  | -0.28630900 |

|    |             |             |             |
|----|-------------|-------------|-------------|
| H  | 2.83047800  | 0.01995500  | -0.56168300 |
| H  | 3.64324000  | 1.43913500  | -1.21358100 |
| C  | 2.18572600  | 1.88894600  | 0.31953500  |
| H  | 2.63161600  | 2.85305400  | 0.59183600  |
| C  | 1.00210100  | 2.14205900  | -0.61836200 |
| C  | 0.32360000  | 0.86169800  | -1.12282700 |
| H  | 0.98123100  | 0.38278800  | -1.85731300 |
| H  | -0.59866600 | 1.13395500  | -1.65185300 |
| H  | 1.34979200  | 2.70788700  | -1.48718800 |
| C  | 4.78793700  | -1.71203500 | 0.07558300  |
| O  | 3.87193900  | -2.04134800 | 0.88287200  |
| O  | 5.27128100  | -2.48225200 | -0.80628200 |
| C  | 0.01846800  | -0.12444800 | -0.00102700 |
| H  | 0.92593300  | -0.59745800 | 0.37930900  |
| H  | -0.50951400 | 0.35611200  | 0.82498300  |
| H  | 1.82509300  | 1.43551000  | 1.25338400  |
| S  | -1.03748300 | -1.46963800 | -0.67361600 |
| H  | -0.94457600 | -2.31029100 | 0.37343300  |
| S  | -0.18591700 | 3.22709200  | 0.28391800  |
| H  | -1.00108300 | 3.46114200  | -0.75892400 |
| Cu | -3.31457700 | -0.62075500 | 0.08686800  |
| O  | -3.81155100 | -0.32192200 | -1.84499100 |
| H  | -4.69149300 | 0.08220000  | -1.90987000 |
| H  | -3.21080400 | 0.28334900  | -2.30788000 |
| O  | -5.24433700 | -0.31959700 | 0.75311700  |
| H  | -5.89165300 | -0.54080400 | 0.06644900  |
| H  | -5.43760000 | -0.90659500 | 1.49973900  |
| O  | -2.58353400 | -0.77926000 | 1.95766900  |
| H  | -3.27528100 | -1.12003900 | 2.54722000  |
| H  | -2.34061500 | 0.08956300  | 2.31574700  |

**[17] Cu<sup>2+</sup> – DHLA<sup>-</sup> (S1, S2 *cis*)**

Charge = 1 Multiplicity = 2

|    |             |             |             |
|----|-------------|-------------|-------------|
| C  | -3.89283700 | -0.50490100 | 0.50116200  |
| H  | -3.64990300 | 0.13344700  | 1.35623100  |
| H  | -4.28371100 | -1.45706200 | 0.87604300  |
| C  | -2.62792000 | -0.76162600 | -0.32431400 |
| H  | -2.28173400 | 0.18753200  | -0.75904900 |
| H  | -2.86317100 | -1.42832100 | -1.16270000 |
| C  | -1.49931400 | -1.36312500 | 0.50971700  |
| H  | -1.81021200 | -2.32928100 | 0.92632700  |
| H  | -1.30594900 | -0.70110600 | 1.36598700  |
| C  | -0.22982900 | -1.54651300 | -0.31850200 |
| H  | -0.00366300 | -0.59894000 | -0.82992600 |
| C  | 0.98404300  | -2.02992500 | 0.47106400  |
| C  | 2.18387400  | -2.41155100 | -0.39810500 |
| H  | 1.90345500  | -3.35118900 | -0.89037200 |
| H  | 3.05001000  | -2.64192700 | 0.23223400  |
| H  | 0.70629200  | -2.90985300 | 1.05759700  |
| C  | -4.95763800 | 0.17406100  | -0.35471700 |
| O  | -5.15167800 | 1.41467700  | -0.19198900 |
| O  | -5.56249400 | -0.53948200 | -1.20804000 |
| C  | 2.59293900  | -1.47477600 | -1.52707400 |
| H  | 3.36781100  | -1.95724800 | -2.12454800 |
| H  | 1.76084200  | -1.23875400 | -2.19432700 |
| H  | -0.41033800 | -2.28585600 | -1.10937900 |
| S  | 3.28901300  | 0.16171400  | -1.05040600 |
| H  | 4.10744500  | -0.26869100 | -0.06854500 |
| S  | 1.39424400  | -0.74754400 | 1.76117600  |
| H  | 2.70553400  | -1.03103600 | 1.89044000  |
| Cu | 1.46547500  | 1.23104200  | 0.30040200  |
| O  | 1.61870800  | 2.80178200  | -0.97559400 |
| H  | 1.19227800  | 2.62825900  | -1.83008800 |
| H  | 1.15180300  | 3.56758400  | -0.60506200 |

|   |             |            |            |
|---|-------------|------------|------------|
| O | -0.24705800 | 1.88245700 | 1.19507700 |
| H | -0.30874600 | 2.84836000 | 1.12640800 |
| H | -1.03865400 | 1.54181500 | 0.74773000 |

**[18] Cu<sup>2+</sup> – DHLA<sup>2-</sup> (CO, S1 *trans*)**

Charge = 0 Multiplicity = 2

|    |             |             |             |
|----|-------------|-------------|-------------|
| C  | -2.22900400 | 1.73797700  | 0.59212300  |
| H  | -2.58770100 | 2.67347200  | 1.02741800  |
| H  | -1.72287500 | 1.16070600  | 1.37537800  |
| C  | -1.24947800 | 2.02094300  | -0.55950400 |
| H  | -1.69096100 | 2.77327300  | -1.22228600 |
| H  | -1.12724500 | 1.11111500  | -1.16188000 |
| C  | 0.12621800  | 2.49236600  | -0.07767700 |
| H  | -0.00366700 | 3.33033900  | 0.61906300  |
| H  | 0.69146100  | 2.88114200  | -0.93472400 |
| C  | 0.95127000  | 1.38861600  | 0.59703000  |
| H  | 0.38130900  | 0.95112300  | 1.42329100  |
| C  | 1.39193100  | 0.28134400  | -0.39118700 |
| C  | 2.89527600  | 0.35723300  | -0.70405000 |
| H  | 3.12102200  | 1.39078900  | -1.00310100 |
| H  | 3.12580400  | -0.28646300 | -1.56008100 |
| H  | 0.88099000  | 0.45207200  | -1.34627600 |
| C  | -3.41275600 | 0.91149700  | 0.11312500  |
| O  | -4.53820600 | 1.44036200  | 0.00039400  |
| O  | -3.20294400 | -0.32623500 | -0.18252200 |
| C  | 3.79393300  | -0.03534200 | 0.46231300  |
| H  | 3.56476400  | 0.53895100  | 1.36312000  |
| H  | 3.66686500  | -1.09318400 | 0.70432700  |
| H  | 1.83783100  | 1.84647100  | 1.05205200  |
| S  | 5.57513300  | 0.14430600  | 0.08784700  |
| H  | 5.55427900  | 1.46318100  | -0.16857700 |
| S  | 0.93248300  | -1.42992700 | 0.14869000  |
| Cu | -1.40893200 | -1.20243600 | -0.04599800 |
| O  | -1.74282100 | -1.52889100 | 1.95142500  |
| H  | -0.95782300 | -1.26772800 | 2.45817600  |
| H  | -2.46506700 | -0.95739900 | 2.25651700  |
| O  | -1.36769700 | -1.39443500 | -2.09532800 |
| H  | -1.86826000 | -0.67316400 | -2.50707100 |
| H  | -0.45454200 | -1.30834100 | -2.41080000 |

**[19] Cu<sup>2+</sup> – DHLA<sup>2-</sup> (CO, S1 *cis*)**

Charge = 0 Multiplicity = 2

|   |             |             |             |
|---|-------------|-------------|-------------|
| C | -2.52178500 | 1.32761600  | 0.88924900  |
| H | -3.19164800 | 1.83181400  | 1.58917300  |
| H | -1.93983100 | 0.57939600  | 1.44206200  |
| C | -1.56738300 | 2.34315700  | 0.22516500  |
| H | -2.09092300 | 3.29750900  | 0.11186100  |
| H | -1.30554100 | 2.00028200  | -0.78334200 |
| C | -0.28045600 | 2.53559900  | 1.03036600  |
| H | -0.53339200 | 2.67277300  | 2.08990300  |
| H | 0.21616200  | 3.45789900  | 0.70432300  |
| C | 0.72137000  | 1.38246800  | 0.88939000  |
| H | 0.27805000  | 0.44045000  | 1.24091100  |
| C | 1.27916500  | 1.23668200  | -0.54618100 |
| C | 2.80994800  | 1.10111800  | -0.54335500 |
| H | 3.21566700  | 1.97785400  | -0.01913000 |
| H | 3.18894700  | 1.13459300  | -1.57084700 |
| H | 1.06218800  | 2.17467000  | -1.07115100 |
| C | -3.32066400 | 0.60601400  | -0.17676400 |
| O | -4.45706200 | 1.01085700  | -0.49881900 |
| O | -2.75232100 | -0.39050200 | -0.76511900 |
| C | 3.32029400  | -0.16328900 | 0.13484500  |
| H | 2.87743500  | -0.29825000 | 1.12523600  |

|    |             |             |             |
|----|-------------|-------------|-------------|
| H  | 3.07921700  | -1.04431300 | -0.46494700 |
| H  | 1.55847100  | 1.58756700  | 1.56961700  |
| S  | 5.14232200  | -0.20544900 | 0.29543100  |
| H  | 5.26186000  | 0.90498700  | 1.04330300  |
| S  | 0.50252700  | -0.08521700 | -1.59578100 |
| Cu | -1.05241400 | -1.22788900 | -0.17077300 |
| O  | -2.17688100 | -2.33541200 | 1.19770000  |
| H  | -1.69213000 | -2.49468800 | 2.02117000  |
| H  | -2.97557400 | -1.84806500 | 1.44957300  |
| O  | 0.51497300  | -2.37770900 | 0.50278100  |
| H  | 0.31511900  | -3.32558500 | 0.54282200  |
| H  | 1.20572000  | -2.26350300 | -0.17115500 |

### [20] Cu<sup>2+</sup> – DHLA<sup>2-</sup> (S1)

Charge = 0 Multiplicity = 2

|    |             |             |             |
|----|-------------|-------------|-------------|
| C  | -4.48549600 | -1.47236000 | 0.11499500  |
| H  | -5.00674800 | -2.19690900 | 0.75361100  |
| H  | -4.91947900 | -1.55370300 | -0.88645900 |
| C  | -2.99141800 | -1.78788800 | 0.07771900  |
| H  | -2.84936900 | -2.81869600 | -0.26895600 |
| H  | -2.58129800 | -1.73484000 | 1.09350600  |
| C  | -2.21579200 | -0.83524400 | -0.83087700 |
| H  | -2.41089600 | 0.19804500  | -0.51311700 |
| H  | -2.59259400 | -0.92280500 | -1.85973700 |
| C  | -0.71250400 | -1.11347700 | -0.81413800 |
| H  | -0.53778000 | -2.15879400 | -1.10034100 |
| C  | 0.09218000  | -0.20949900 | -1.75228900 |
| C  | -0.08980800 | 1.28883900  | -1.44887400 |
| H  | -1.09771600 | 1.58693100  | -1.76812200 |
| H  | 0.61680100  | 1.86446500  | -2.05544300 |
| H  | -0.28167400 | -0.36828900 | -2.77069500 |
| C  | -4.80427000 | -0.08523800 | 0.67759800  |
| O  | -4.14631900 | 0.31365900  | 1.68237800  |
| O  | -5.73185800 | 0.57634900  | 0.12455800  |
| C  | 0.06860900  | 1.67332900  | 0.01858600  |
| H  | -0.67628100 | 1.17941300  | 0.64668800  |
| H  | 1.05658300  | 1.41347100  | 0.41293800  |
| H  | -0.33306900 | -1.00669600 | 0.21175000  |
| S  | -0.06515700 | 3.47846200  | 0.29090700  |
| H  | -1.30172200 | 3.61319300  | -0.21854300 |
| S  | 1.86588200  | -0.71992800 | -1.85688700 |
| Cu | 2.65562600  | -0.58797300 | 0.36900300  |
| O  | 3.66308000  | 1.15511500  | -0.06986500 |
| H  | 3.25000400  | 1.48844300  | -0.88399200 |
| H  | 3.51816500  | 1.83490900  | 0.60680400  |
| O  | 3.30050600  | -0.46036300 | 2.31489100  |
| H  | 3.52737900  | 0.44735500  | 2.56650100  |
| H  | 2.60566000  | -0.74076500 | 2.92931700  |
| O  | 1.80107300  | -2.35886200 | 0.91651400  |
| H  | 2.43852200  | -2.95581800 | 1.33845600  |
| H  | 1.48989300  | -2.81221400 | 0.11632800  |

### [21] Cu<sup>2+</sup> – DHLA<sup>2-</sup> (CO)

Charge = 0 Multiplicity = 2

|   |             |            |             |
|---|-------------|------------|-------------|
| C | 0.67514100  | 3.24637900 | -0.14289800 |
| H | 1.01720900  | 4.16673000 | 0.33654000  |
| H | 0.68727900  | 3.38245100 | -1.22798500 |
| C | -0.75753300 | 2.92333600 | 0.31740200  |
| H | -1.38893400 | 3.78319300 | 0.06519400  |
| H | -0.77507700 | 2.82860700 | 1.41070400  |
| C | -1.34664700 | 1.66293700 | -0.31563800 |
| H | -0.75959000 | 0.78891400 | -0.00150900 |
| H | -1.24932300 | 1.72551700 | -1.40976200 |

|    |             |             |             |
|----|-------------|-------------|-------------|
| C  | -2.81639400 | 1.46337500  | 0.06183300  |
| H  | -3.37038000 | 2.38456600  | -0.15897300 |
| C  | -3.51711100 | 0.30544300  | -0.66474100 |
| C  | -2.72821900 | -1.01242100 | -0.55954400 |
| H  | -1.76839100 | -0.90569900 | -1.08639900 |
| H  | -3.28442400 | -1.80188000 | -1.07619100 |
| H  | -3.52933900 | 0.56202500  | -1.73292200 |
| C  | 1.62686600  | 2.12919100  | 0.22351500  |
| O  | 2.18470600  | 2.12864600  | 1.34882100  |
| O  | 1.78395200  | 1.20381300  | -0.65140700 |
| C  | -2.45440600 | -1.45047600 | 0.87202200  |
| H  | -1.89026100 | -0.69507200 | 1.42444200  |
| H  | -3.39534600 | -1.61841500 | 1.40288300  |
| H  | -2.89658800 | 1.31387400  | 1.14711400  |
| S  | -1.54242100 | -3.03341000 | 0.98239700  |
| H  | -0.45994700 | -2.63187300 | 0.29167600  |
| S  | -5.26901300 | 0.12167700  | -0.11837100 |
| Cu | 2.71015200  | -0.50720600 | -0.35393500 |
| O  | 1.28071800  | -1.36298200 | -1.53464600 |
| H  | 1.15711400  | -2.30908800 | -1.36586200 |
| H  | 0.42247700  | -0.94120100 | -1.36959900 |
| O  | 3.63523100  | -2.29973100 | -0.17242200 |
| H  | 3.57798800  | -2.82408900 | -0.98555800 |
| H  | 4.58041300  | -2.19901100 | 0.01691200  |
| O  | 4.08752400  | 0.32287700  | 0.89754600  |
| H  | 4.32711500  | -0.29234800 | 1.60603700  |
| H  | 3.51930600  | 1.03193600  | 1.29812100  |

## [22] Cu<sup>2+</sup> – DHLA<sup>2-</sup> (COO)

Charge = 0 Multiplicity = 2

|    |             |             |             |
|----|-------------|-------------|-------------|
| C  | 0.62085200  | 3.20022900  | -0.17961200 |
| H  | 1.09216700  | 3.98057300  | 0.42438200  |
| H  | 0.57231400  | 3.53032300  | -1.21979400 |
| C  | -0.78667400 | 2.87942100  | 0.35761300  |
| H  | -1.41269800 | 3.77169200  | 0.25206800  |
| H  | -0.71629800 | 2.65691000  | 1.42922000  |
| C  | -1.41830400 | 1.69415000  | -0.36868800 |
| H  | -0.71697300 | 0.84947100  | -0.33063900 |
| H  | -1.54464700 | 1.93959600  | -1.43312600 |
| C  | -2.75106400 | 1.24890200  | 0.23317200  |
| H  | -3.45150800 | 2.09359300  | 0.24718100  |
| C  | -3.41692800 | 0.07836500  | -0.51132100 |
| C  | -2.41584900 | -1.05070900 | -0.82134600 |
| H  | -1.64904100 | -0.67123200 | -1.51070900 |
| H  | -2.93677400 | -1.85810700 | -1.34735600 |
| H  | -3.73879900 | 0.46500100  | -1.48798300 |
| C  | 1.46059600  | 1.95822900  | -0.10287100 |
| O  | 1.79466000  | 1.47218400  | 1.02736100  |
| O  | 1.79754000  | 1.31546200  | -1.15132700 |
| C  | -1.72730100 | -1.62439500 | 0.41207200  |
| H  | -1.34120700 | -0.83948200 | 1.06714200  |
| H  | -2.42506000 | -2.22470500 | 1.00054500  |
| H  | -2.59300900 | 0.96772200  | 1.28294300  |
| S  | -0.33560900 | -2.74642500 | 0.01023900  |
| H  | 0.48467500  | -1.80748700 | -0.50307600 |
| S  | -4.91907900 | -0.52341700 | 0.37161800  |
| Cu | 2.56393800  | -0.16471200 | 0.02961200  |
| O  | 2.98919600  | -1.56305800 | -1.37474500 |
| H  | 3.11613600  | -1.14160500 | -2.23844700 |
| H  | 3.81182500  | -2.03896100 | -1.18410700 |
| O  | 3.20498300  | -1.26394400 | 1.60166100  |
| H  | 3.91088400  | -1.88182300 | 1.35862700  |
| H  | 3.57582100  | -0.68766500 | 2.28697100  |



**[23] Cu<sup>2+</sup> – DHLA<sup>2-</sup> (CO, S2 cis)**

Charge = 0 Multiplicity = 2

|    |             |             |             |
|----|-------------|-------------|-------------|
| C  | 0.19037800  | 3.23901500  | 0.48668400  |
| H  | 0.63819600  | 3.76319300  | 1.34025400  |
| H  | 0.12359500  | 3.96909400  | -0.32675100 |
| C  | -1.18048100 | 2.67828500  | 0.84987400  |
| H  | -1.80199800 | 3.47780500  | 1.26817000  |
| H  | -1.05680500 | 1.92867100  | 1.63921600  |
| C  | -1.88020500 | 2.03960900  | -0.35501700 |
| H  | -1.12764000 | 1.50262900  | -0.94108100 |
| H  | -2.26613200 | 2.82713100  | -1.01217200 |
| C  | -3.01423100 | 1.07224500  | 0.03172700  |
| H  | -3.98840600 | 1.55511200  | -0.10109400 |
| C  | -2.98929600 | -0.22707200 | -0.78558700 |
| C  | -1.67913100 | -1.02429500 | -0.67575300 |
| H  | -0.90214300 | -0.48660700 | -1.23344200 |
| H  | -1.80440700 | -1.98685900 | -1.18631700 |
| H  | -3.15339800 | 0.01702300  | -1.84024300 |
| C  | 1.19883700  | 2.17971000  | 0.07042700  |
| O  | 2.21790600  | 2.54780900  | -0.57733600 |
| O  | 0.97290000  | 0.97603900  | 0.42100400  |
| C  | -1.17869000 | -1.26475900 | 0.74502900  |
| H  | -1.04230500 | -0.31493600 | 1.26658200  |
| H  | -1.91335300 | -1.84820700 | 1.30880800  |
| H  | -2.93740500 | 0.82011700  | 1.09662700  |
| S  | 0.40665800  | -2.18336700 | 0.79994700  |
| S  | -4.44753900 | -1.21888300 | -0.24100900 |
| H  | -4.22301400 | -2.28221700 | -1.03159100 |
| Cu | 2.02921900  | -0.67758600 | 0.01855100  |
| O  | 3.28861500  | -2.32936700 | -0.16033600 |
| H  | 2.80676800  | -3.11850800 | -0.45054700 |
| H  | 3.96761900  | -2.17105500 | -0.83356500 |
| O  | 3.54370700  | 0.38225500  | -0.87421300 |
| H  | 4.34466900  | 0.34899000  | -0.33223000 |
| H  | 3.15478700  | 1.31429400  | -0.78886200 |

**[24] Cu<sup>2+</sup> – DHLA<sup>2-</sup> (CO, S2 trans)**

Charge = 0 Multiplicity = 2

|   |             |             |             |
|---|-------------|-------------|-------------|
| C | 1.72997600  | 2.93158700  | 0.07727000  |
| H | 2.33284300  | 3.45128100  | 0.83012600  |
| H | 1.73745300  | 3.52946700  | -0.83775600 |
| C | 0.29669800  | 2.73693900  | 0.59412500  |
| H | -0.17771400 | 3.71917600  | 0.69818300  |
| H | 0.33006600  | 2.28847000  | 1.59494400  |
| C | -0.53524200 | 1.84504700  | -0.32623800 |
| H | -0.02775800 | 0.87553300  | -0.41857300 |
| H | -0.57130400 | 2.27730300  | -1.33586300 |
| C | -1.95283700 | 1.60636200  | 0.19009700  |
| H | -2.47813900 | 2.56518600  | 0.27817000  |
| C | -2.77081900 | 0.67909600  | -0.72157900 |
| C | -2.06564000 | -0.63300400 | -1.08921900 |
| H | -1.17402800 | -0.37164300 | -1.67015800 |
| H | -2.70767300 | -1.21073700 | -1.76483000 |
| H | -2.98994200 | 1.21681200  | -1.64934100 |
| C | 2.38427700  | 1.59415600  | -0.21499200 |
| O | 2.89819400  | 1.37794100  | -1.34053500 |
| O | 2.34043200  | 0.71380100  | 0.71845700  |
| C | -1.65809400 | -1.50245700 | 0.10418500  |
| H | -1.40043300 | -0.86852100 | 0.95766600  |
| H | -2.49966200 | -2.12318600 | 0.42179900  |
| H | -1.89641800 | 1.18604400  | 1.20321600  |
| S | -0.23567400 | -2.62079500 | -0.25179200 |
| S | -4.38644500 | 0.39273100  | 0.12163600  |
| H | -4.91661800 | -0.40672800 | -0.82008100 |

|    |            |             |             |
|----|------------|-------------|-------------|
| Cu | 1.45766600 | -1.09581000 | 0.31576800  |
| O  | 0.79519600 | -0.88357400 | 2.25166900  |
| H  | 0.40575900 | -0.00195100 | 2.36543100  |
| H  | 0.10582100 | -1.52120400 | 2.49220200  |
| O  | 2.56700500 | -1.27995900 | -1.42288000 |
| H  | 3.35613100 | -1.80801500 | -1.23169800 |
| H  | 2.87669100 | -0.34180300 | -1.52379600 |

### [25] Cu<sup>2+</sup> – DHLA<sup>2-</sup> (CO)

Charge = 0 Multiplicity = 2

|    |             |             |             |
|----|-------------|-------------|-------------|
| C  | 0.62328700  | 3.32174600  | -0.49166200 |
| H  | 0.97115100  | 4.29283600  | -0.13110500 |
| H  | 0.59243900  | 3.33358200  | -1.58445800 |
| C  | -0.77853400 | 3.02630800  | 0.07124200  |
| H  | -1.43668500 | 3.86570200  | -0.17867200 |
| H  | -0.72197300 | 2.98093700  | 1.16634900  |
| C  | -1.37816600 | 1.72898800  | -0.46938800 |
| H  | -0.67256700 | 0.90331500  | -0.31135600 |
| H  | -1.51602900 | 1.81833600  | -1.55605500 |
| C  | -2.71021400 | 1.38775000  | 0.19747700  |
| H  | -3.37237100 | 2.26167800  | 0.15829100  |
| C  | -3.41765700 | 0.20302100  | -0.46846400 |
| C  | -2.54165800 | -1.04598800 | -0.63361800 |
| H  | -1.77858000 | -0.81094300 | -1.38810900 |
| H  | -3.14827000 | -1.85432300 | -1.05993900 |
| H  | -3.75119600 | 0.51900200  | -1.46210700 |
| C  | 1.58920600  | 2.25643100  | -0.02428600 |
| O  | 2.07938700  | 2.34798900  | 1.13280000  |
| O  | 1.82053600  | 1.28091500  | -0.81908200 |
| C  | -1.85300700 | -1.54714900 | 0.63330700  |
| H  | -1.24841600 | -0.74383700 | 1.06954800  |
| H  | -2.60917700 | -1.81291600 | 1.37902400  |
| H  | -2.53443400 | 1.17091800  | 1.25961800  |
| S  | -0.77189700 | -3.00511600 | 0.32964100  |
| S  | -4.94657500 | -0.13276300 | 0.50912200  |
| H  | -5.43581600 | -1.09376300 | -0.29289000 |
| Cu | 2.45456000  | -0.51856900 | -0.21753600 |
| O  | 1.06997400  | -1.38783100 | -1.38615900 |
| H  | 0.44760600  | -1.98250200 | -0.81062700 |
| H  | 0.50623100  | -0.69174500 | -1.75866800 |
| O  | 3.23780800  | -2.36715100 | 0.15744400  |
| H  | 3.16217300  | -2.93942500 | -0.62090200 |
| H  | 4.18343900  | -2.31230800 | 0.36148700  |
| O  | 3.63915700  | 0.30359900  | 1.21209600  |
| H  | 3.59447900  | -0.21563800 | 2.02782100  |
| H  | 3.10689600  | 1.14884400  | 1.35662500  |

### [26] Cu<sup>2+</sup> – DHLA<sup>2-</sup> (COO, S2)

Charge = 0 Multiplicity = 2

|   |             |             |             |
|---|-------------|-------------|-------------|
| C | -0.88294800 | 3.14040700  | -0.13679200 |
| H | -1.28482900 | 3.80911300  | -0.90576200 |
| H | -1.10472600 | 3.57524600  | 0.84110500  |
| C | 0.62564900  | 2.93249700  | -0.34011000 |
| H | 1.14160300  | 3.88954000  | -0.21425900 |
| H | 0.79140400  | 2.61163500  | -1.37419300 |
| C | 1.19730300  | 1.87254100  | 0.61162700  |
| H | 0.44269800  | 1.09103700  | 0.75140500  |
| H | 1.37364100  | 2.30408400  | 1.60428900  |
| C | 2.47764600  | 1.21644000  | 0.08427200  |
| H | 3.33226000  | 1.88769800  | 0.22902500  |
| C | 2.77915700  | -0.13478500 | 0.74911700  |
| C | 1.61801000  | -1.14134300 | 0.69442000  |
| H | 0.84108000  | -0.79442400 | 1.38615800  |

|    |             |             |             |
|----|-------------|-------------|-------------|
| H  | 1.95965000  | -2.10559900 | 1.08963400  |
| H  | 3.03377900  | 0.03424000  | 1.80010100  |
| C  | -1.59264300 | 1.81246400  | -0.23518500 |
| O  | -1.26360900 | 0.98774700  | -1.15349200 |
| O  | -2.44034600 | 1.44235600  | 0.63335900  |
| C  | 0.99519700  | -1.34786200 | -0.68602500 |
| H  | 0.78290900  | -0.38754100 | -1.16232200 |
| H  | 1.69045500  | -1.88623500 | -1.33659300 |
| H  | 2.37892000  | 1.06441600  | -0.99799900 |
| S  | -0.57380100 | -2.30939600 | -0.62794300 |
| S  | 4.30109600  | -0.78856000 | -0.06456000 |
| H  | 4.40111200  | -1.91253500 | 0.66547100  |
| Cu | -2.03100400 | -0.56156500 | -0.06671100 |
| O  | -3.31859300 | -1.63512000 | 1.06354900  |
| H  | -4.20031600 | -1.23210600 | 1.04841500  |
| H  | -3.44108600 | -2.55790000 | 0.79490800  |

### [27] Cu<sup>2+</sup> – DHLA<sup>2-</sup> (S2)

Charge = 0 Multiplicity = 2

|    |             |             |             |
|----|-------------|-------------|-------------|
| C  | 5.31836100  | -0.05894300 | -0.50090300 |
| H  | 6.34296800  | 0.15779500  | -0.17211200 |
| H  | 5.34477600  | -0.11761300 | -1.59400700 |
| C  | 4.37355000  | 1.04807200  | -0.04322600 |
| H  | 4.76854000  | 2.01931600  | -0.36449900 |
| H  | 4.33845400  | 1.06525100  | 1.05249800  |
| C  | 2.95993700  | 0.87058000  | -0.59589900 |
| H  | 2.61605000  | -0.14968200 | -0.38248700 |
| H  | 2.98143200  | 0.97343800  | -1.68973600 |
| C  | 1.97774900  | 1.88422000  | -0.00755600 |
| H  | 2.37956600  | 2.89557900  | -0.14253300 |
| C  | 0.59779900  | 1.80979400  | -0.66321000 |
| C  | -0.05606500 | 0.42518200  | -0.59518700 |
| H  | 0.47757400  | -0.25200600 | -1.27356700 |
| H  | -1.07838900 | 0.51121700  | -0.98967700 |
| H  | 0.69199500  | 2.10636200  | -1.71200600 |
| C  | 4.97999500  | -1.44711200 | 0.05067500  |
| O  | 4.44084900  | -1.52660800 | 1.19148800  |
| O  | 5.29823100  | -2.44694700 | -0.65953400 |
| C  | -0.08257800 | -0.18964800 | 0.80423300  |
| H  | 0.92479500  | -0.50341300 | 1.09521700  |
| H  | -0.40434800 | 0.54931800  | 1.54630400  |
| H  | 1.88961200  | 1.71911200  | 1.07493800  |
| S  | -1.16320200 | -1.66707400 | 0.91617400  |
| S  | -0.48745800 | 3.09018000  | 0.12186800  |
| H  | -1.36850700 | 3.18324600  | -0.88992500 |
| Cu | -3.11577900 | -0.67839800 | 0.04304900  |
| O  | -3.39975300 | -2.40129200 | -1.04484500 |
| H  | -3.85052000 | -2.28065900 | -1.89445300 |
| H  | -2.52348900 | -2.76575400 | -1.24595500 |
| O  | -4.71150600 | 0.19161000  | -0.94336900 |
| H  | -5.29562200 | -0.45947700 | -1.35974600 |
| H  | -5.27797500 | 0.72118500  | -0.36305800 |
| O  | -2.95485700 | 0.97992500  | 1.26731600  |
| H  | -3.75822300 | 1.52171700  | 1.24569600  |
| H  | -2.22675600 | 1.58254100  | 1.02003400  |

### [28] Cu<sup>2+</sup> – DHLA<sup>2-</sup> (COO)

Charge = 0 Multiplicity = 2

|   |             |            |             |
|---|-------------|------------|-------------|
| C | 0.57681200  | 3.14697600 | -0.25592100 |
| H | 1.06451600  | 3.93826800 | 0.32322000  |
| H | 0.56407600  | 3.44398900 | -1.30730200 |
| C | -0.84216600 | 2.89148700 | 0.26970800  |
| H | -1.42666900 | 3.81340900 | 0.18736600  |

|    |             |             |             |
|----|-------------|-------------|-------------|
| H  | -0.78387300 | 2.64012100  | 1.33502100  |
| C  | -1.52667300 | 1.75308500  | -0.48710300 |
| H  | -0.81240800 | 0.92806600  | -0.60747300 |
| H  | -1.79034900 | 2.08333100  | -1.50055400 |
| C  | -2.76439200 | 1.22544000  | 0.23573900  |
| H  | -3.49303500 | 2.03592000  | 0.36162600  |
| C  | -3.42779500 | 0.05808900  | -0.50403000 |
| C  | -2.45733400 | -1.06678900 | -0.89256700 |
| H  | -1.80933900 | -0.68070100 | -1.68981700 |
| H  | -3.02567500 | -1.89104500 | -1.34156400 |
| H  | -3.89094600 | 0.44329000  | -1.41822900 |
| C  | 1.40502000  | 1.89886900  | -0.11697400 |
| O  | 1.48822300  | 1.30411700  | 1.00817800  |
| O  | 2.00647000  | 1.37680700  | -1.11025200 |
| C  | -1.57741000 | -1.61475900 | 0.22977600  |
| H  | -1.06419400 | -0.78633400 | 0.73236600  |
| H  | -2.21350700 | -2.09083500 | 0.98441400  |
| H  | -2.47163700 | 0.90242200  | 1.24351400  |
| S  | -0.31686300 | -2.81368400 | -0.37275000 |
| S  | -4.80735900 | -0.53712600 | 0.56810000  |
| H  | -5.25555900 | -1.49099000 | -0.26587500 |
| Cu | 2.60999700  | -0.16204900 | 0.12484900  |
| O  | 3.63860500  | -1.31993200 | -1.16861800 |
| H  | 4.02902400  | -0.78314500 | -1.87478600 |
| H  | 4.37648100  | -1.77473300 | -0.73527400 |
| O  | 2.98959400  | -1.29636500 | 1.75655000  |
| H  | 3.68719500  | -1.94727700 | 1.58532000  |
| H  | 3.31403000  | -0.74275700 | 2.48316900  |

### [29] Cu<sup>+</sup> - DHLA<sup>2-</sup> (COO)

Charge = -1 Multiplicity = 1

|    |             |             |             |
|----|-------------|-------------|-------------|
| C  | 0.22899500  | 3.56692900  | 0.24757800  |
| H  | 0.39914400  | 4.43665200  | 0.89145600  |
| H  | 0.28403000  | 3.89558400  | -0.79378200 |
| C  | -1.14485200 | 2.95554200  | 0.54553400  |
| H  | -1.92342200 | 3.69092800  | 0.31253900  |
| H  | -1.21926600 | 2.73678700  | 1.61765600  |
| C  | -1.38615200 | 1.67286500  | -0.24744500 |
| H  | -0.57956000 | 0.96028700  | -0.02041000 |
| H  | -1.32303600 | 1.88476200  | -1.32408400 |
| C  | -2.73420000 | 1.03056600  | 0.07547100  |
| H  | -3.53679400 | 1.75327800  | -0.11686900 |
| C  | -2.99850600 | -0.23549100 | -0.74770700 |
| C  | -1.85255100 | -1.25393700 | -0.70928700 |
| H  | -0.99785500 | -0.80732000 | -1.23358600 |
| H  | -2.13592600 | -2.14067900 | -1.28920900 |
| H  | -3.15880100 | 0.05762800  | -1.79001400 |
| C  | 1.33644500  | 2.55707600  | 0.51368000  |
| O  | 2.11342600  | 2.25979100  | -0.45911600 |
| O  | 1.42343700  | 2.04262600  | 1.65585600  |
| C  | -1.40676100 | -1.68030900 | 0.68641400  |
| H  | -1.23314400 | -0.80366700 | 1.31683000  |
| H  | -2.19608100 | -2.26800400 | 1.16457900  |
| H  | -2.77140000 | 0.79462100  | 1.14707400  |
| S  | 0.12037700  | -2.70910500 | 0.66502800  |
| S  | -4.59441000 | -0.94577500 | -0.15242900 |
| H  | -4.63634900 | -1.97722000 | -1.01284300 |
| Cu | 1.71801100  | -1.15991800 | 0.31805000  |
| O  | 3.80582700  | -2.13354500 | -1.71582400 |
| H  | 3.01872300  | -2.61277300 | -1.41978800 |
| H  | 3.76272100  | -1.29743600 | -1.21863000 |
| O  | 3.27620100  | 0.07849200  | 0.01242700  |
| H  | 3.78574100  | 0.14844700  | 0.83155700  |
| H  | 2.85326400  | 1.00762300  | -0.15495000 |

**[30] [Cu(H<sub>2</sub>O)<sub>2</sub>]<sup>+</sup> · 2H<sub>2</sub>O**

Charge = 1 Multiplicity = 1

|    |             |             |             |
|----|-------------|-------------|-------------|
| Cu | 0.01047600  | -0.03949600 | 0.15124100  |
| O  | -1.59124200 | 1.12649400  | 0.27849500  |
| H  | -2.38928300 | 0.60386200  | 0.01969200  |
| H  | -1.53619600 | 1.86887600  | -0.33860200 |
| O  | 1.62124100  | -1.19796400 | 0.05402900  |
| H  | 1.76555600  | -1.67032600 | 0.88546500  |
| H  | 2.40271100  | -0.60682200 | -0.07372200 |
| O  | 3.59303700  | 0.57380600  | -0.42562000 |
| H  | 4.48179400  | 0.20582000  | -0.52252100 |
| O  | -3.67002900 | -0.47490000 | -0.32935600 |
| H  | -4.51279100 | -0.15525500 | 0.02075100  |
| H  | -3.80386000 | -0.54363000 | -1.28462000 |
| H  | 3.66419300  | 1.22338400  | 0.28719700  |

**[31] [Cu(H<sub>2</sub>O)<sub>4</sub>]<sup>2+</sup>**

Charge = 2 Multiplicity = 2

|    |             |             |             |
|----|-------------|-------------|-------------|
| Cu | -0.22194400 | -0.40244900 | 0.49999500  |
| O  | -0.16283600 | 1.61946000  | 0.18639500  |
| H  | 0.51837700  | 1.83503000  | -0.46890700 |
| H  | -0.99845600 | 1.92689800  | -0.19710000 |
| O  | 0.33530700  | -0.84982100 | -1.38819000 |
| H  | -0.09832600 | -1.65213200 | -1.71576500 |
| H  | 0.11602200  | -0.14410000 | -2.01495600 |
| O  | -0.78231000 | 0.04111000  | 2.38730300  |
| H  | -0.55851800 | -0.66236900 | 3.01491600  |
| H  | -0.35817300 | 0.84794700  | 2.71609600  |
| O  | -0.28118900 | -2.42569200 | 0.81240500  |
| H  | 0.55531000  | -2.73275500 | 1.19428200  |
| H  | -0.96085500 | -2.64106400 | 1.46935600  |

**[32] (H<sub>2</sub>O)<sub>2</sub>**

Charge = 0 Multiplicity = 1

|   |             |             |             |
|---|-------------|-------------|-------------|
| O | 1.48346800  | -0.09697500 | -0.04698000 |
| H | 0.51257900  | 0.00644900  | -0.03865100 |
| H | 1.83807100  | 0.79971300  | -0.08379100 |
| O | -1.32778400 | 0.05426100  | -0.01967500 |
| H | -1.69576800 | -0.59333600 | -0.63582400 |
| H | -1.65821500 | -0.21250500 | 0.84863700  |

**[33] (H<sub>2</sub>O)<sub>3</sub>**

Charge = 0 Multiplicity = 1

|   |             |             |             |
|---|-------------|-------------|-------------|
| O | 0.00021800  | 1.10996700  | -0.00001800 |
| H | 0.77856700  | 0.52344100  | -0.00717500 |
| H | -0.77824600 | 0.52363600  | 0.00715500  |
| O | 2.30693800  | -0.53095900 | -0.01237900 |
| H | 2.93697900  | -0.27385900 | -0.69863100 |
| H | 2.79218000  | -0.44249300 | 0.81879400  |
| O | -2.30714700 | -0.53081500 | 0.01245100  |
| H | -2.79205600 | -0.44266300 | -0.81894200 |
| H | -2.93749200 | -0.27360400 | 0.69837100  |

**[34] LA<sup>-</sup>**

Charge = -1 Multiplicity = 1

|   |            |            |             |
|---|------------|------------|-------------|
| C | 4.09469500 | 0.94933200 | -0.12034300 |
| H | 4.81442200 | 1.38165800 | 0.57779900  |
| H | 4.45859100 | 1.10244900 | -1.13727600 |
| C | 2.67905200 | 1.54204300 | 0.04959200  |

|   |             |             |             |
|---|-------------|-------------|-------------|
| H | 2.39835700  | 2.04684500  | -0.87993700 |
| H | 2.67214100  | 2.28783800  | 0.84992100  |
| C | 1.61097600  | 0.48313400  | 0.36845800  |
| H | 1.61963200  | 0.25327700  | 1.43950300  |
| S | 4.06568100  | -0.85296400 | 0.22142100  |
| S | 2.12103000  | -1.06299600 | -0.48906300 |
| C | 0.21222500  | 0.91290700  | -0.05751100 |
| H | 0.00663500  | 1.87214700  | 0.43622400  |
| H | 0.20826200  | 1.10767200  | -1.13833700 |
| C | -0.88805100 | -0.08393900 | 0.29912500  |
| H | -0.72338400 | -1.02839000 | -0.23767100 |
| H | -0.83162900 | -0.31862000 | 1.37089900  |
| C | -2.28034600 | 0.44606000  | -0.03713200 |
| H | -2.32574200 | 0.69328100  | -1.10555000 |
| H | -2.45403300 | 1.38134400  | 0.50827000  |
| C | -3.37603100 | -0.55716100 | 0.29984600  |
| H | -3.19729100 | -1.50773400 | -0.21597700 |
| H | -3.35814600 | -0.78852200 | 1.37348100  |
| C | -4.80292400 | -0.11506600 | -0.02538400 |
| O | -5.70319200 | -1.00530100 | 0.04493700  |
| O | -5.01840400 | 1.09383400  | -0.32231100 |

### [35] DHLA-

Charge = -1 Multiplicity = 1

|   |             |             |             |
|---|-------------|-------------|-------------|
| C | 3.39553800  | -1.28183200 | -0.00250900 |
| H | 4.18892700  | -1.77661300 | -0.57697700 |
| H | 3.55028100  | -1.53960900 | 1.04983700  |
| C | 2.02826800  | -1.76955900 | -0.47796000 |
| H | 1.98507900  | -2.86178100 | -0.39021200 |
| H | 1.90351600  | -1.53172200 | -1.54112700 |
| C | 0.87950800  | -1.15163000 | 0.31766600  |
| H | 0.96318400  | -0.05750500 | 0.27512500  |
| H | 0.97115900  | -1.43489200 | 1.37545400  |
| C | -0.48561300 | -1.58796800 | -0.21251100 |
| H | -0.52878700 | -2.68397100 | -0.23142200 |
| C | -1.65226100 | -1.06733500 | 0.63209800  |
| C | -1.66782700 | 0.45465200  | 0.81996300  |
| H | -0.81416500 | 0.72410800  | 1.45487400  |
| H | -2.57030700 | 0.74056600  | 1.37166100  |
| H | -1.59637900 | -1.52796700 | 1.62299700  |
| C | 3.60538100  | 0.22474400  | -0.17467900 |
| O | 3.18781400  | 0.76369400  | -1.24069300 |
| O | 4.21138400  | 0.84471200  | 0.74829500  |
| C | -1.59279700 | 1.24622900  | -0.47946200 |
| H | -0.67470700 | 1.02966600  | -1.03048600 |
| H | -2.43748400 | 1.00893700  | -1.13224700 |
| H | -0.59571400 | -1.25063200 | -1.25174600 |
| S | -1.68967000 | 3.05277900  | -0.21324200 |
| H | -0.58961400 | 3.15409400  | 0.55228000  |
| S | -3.20517600 | -1.68401500 | -0.14942600 |
| H | -4.04952200 | -1.19646700 | 0.77548900  |

### [36] S1-deprotonated DHLA<sup>2-</sup>

Charge = -2 Multiplicity = 1

|   |            |             |             |
|---|------------|-------------|-------------|
| C | 3.40680400 | -1.28689000 | 0.00904100  |
| H | 4.20071400 | -1.78970000 | -0.55812000 |
| H | 3.55363400 | -1.54017700 | 1.06370200  |
| C | 2.03801100 | -1.76731300 | -0.47106000 |
| H | 1.98741300 | -2.85871100 | -0.37316500 |
| H | 1.92475300 | -1.54116300 | -1.53843600 |
| C | 0.88307900 | -1.13560900 | 0.30550000  |
| H | 0.97169900 | -0.04186500 | 0.24628600  |

|   |             |             |             |
|---|-------------|-------------|-------------|
| H | 0.97297200  | -1.39902900 | 1.36972100  |
| C | -0.48429800 | -1.57589500 | -0.22110600 |
| H | -0.51887600 | -2.67272900 | -0.24905900 |
| C | -1.68388100 | -1.08366100 | 0.60149400  |
| C | -1.65604100 | 0.44108500  | 0.81804200  |
| H | -0.77977400 | 0.71079400  | 1.42530000  |
| H | -2.54286100 | 0.73104300  | 1.39181200  |
| H | -1.58891500 | -1.52902100 | 1.60131500  |
| C | 3.62854600  | 0.21690900  | -0.16884400 |
| O | 3.23151200  | 0.75208300  | -1.24474100 |
| O | 4.22371900  | 0.83982400  | 0.75961100  |
| C | -1.61577700 | 1.24271400  | -0.47528300 |
| H | -0.71478700 | 1.02716200  | -1.05526700 |
| H | -2.48191700 | 1.00087700  | -1.09731500 |
| H | -0.59611900 | -1.24277000 | -1.26210700 |
| S | -1.70163500 | 3.05214100  | -0.20999400 |
| H | -0.60549700 | 3.15071700  | 0.56137800  |
| S | -3.28294000 | -1.66366400 | -0.11315200 |

### [37] S2-deprotonated DHLA<sup>2-</sup>

Charge = -2 Multiplicity = 1

|   |             |             |             |
|---|-------------|-------------|-------------|
| C | 3.38782100  | -1.04997100 | 0.11342400  |
| H | 4.22287100  | -1.50726800 | -0.43276400 |
| H | 3.51141800  | -1.31450700 | 1.16838300  |
| C | 2.06148500  | -1.58443500 | -0.42161400 |
| H | 2.06749800  | -2.67987400 | -0.36842000 |
| H | 1.96112500  | -1.32007200 | -1.48107800 |
| C | 0.85774300  | -1.04807800 | 0.35158200  |
| H | 0.88904400  | 0.04967500  | 0.35356700  |
| H | 0.92554800  | -1.36870900 | 1.40058600  |
| C | -0.46573100 | -1.52504200 | -0.24532600 |
| H | -0.44500600 | -2.61954500 | -0.32857100 |
| C | -1.68106300 | -1.11485500 | 0.59002800  |
| C | -1.80723300 | 0.39637800  | 0.82705300  |
| H | -1.00428200 | 0.69483400  | 1.51450800  |
| H | -2.74841200 | 0.59366600  | 1.35544100  |
| H | -1.61429200 | -1.61331700 | 1.56261600  |
| C | 3.55279400  | 0.46459200  | -0.03452600 |
| O | 3.12566500  | 1.00936900  | -1.09332600 |
| O | 4.14124100  | 1.08478100  | 0.90011800  |
| C | -1.73867300 | 1.27268900  | -0.42098700 |
| H | -0.75671100 | 1.14979800  | -0.89307300 |
| H | -2.48188000 | 0.91984500  | -1.14520200 |
| H | -0.56675500 | -1.13184300 | -1.26539600 |
| S | -2.01910700 | 3.05655300  | -0.06570900 |
| S | -3.16934200 | -1.81731000 | -0.24946200 |
| H | -4.08309600 | -1.30145000 | 0.58998900  |
